# Supplementary material for: Integrative QTL analysis of gene expression and chromatin accessibility identifies multi-tissue patterns of genetic regulation
Source: PubMed Central journal article supplement (PMC7010298; doi:10.1371/journal.pgen.1008537), 2020-01-21
Supplement: pgen.1008537.s025.pdf [file pgen.1008537.s025.pdf]

Table S1: Number of differentially expressed genes and accessible chromatin regions detected between liver, lung, and kidney tissues at  $FDR \leq 0.1$

|                   |                         | Tissue comparison           |                             |                             |
|-------------------|-------------------------|-----------------------------|-----------------------------|-----------------------------|
|                   |                         | Liver/lung                  | Liver/kidney                | Lung/kidney                 |
| Genes             | Up-regulated            | 2,473 (20.8 <sup>a</sup> )  | 2,123 (17.9 <sup>a</sup> )  | 2,246 (18.9 <sup>a</sup> )  |
|                   | Down-regulated          | 3,236 (27.2 <sup>a</sup> )  | 1,441 (12.1 <sup>a</sup> )  | 2,527 (21.3 <sup>a</sup> )  |
|                   | Total                   | 5,709 (48.0 <sup>a</sup> )  | 3,564 (30.0 <sup>a</sup> )  | 4,773 (40.2 <sup>a</sup> )  |
| Chromatin regions | Increased accessibility | 20,194 (19.6 <sup>b</sup> ) | 15,252 (12.9 <sup>b</sup> ) | 19,202 (17.4 <sup>b</sup> ) |
|                   | Decreased accessibility | 20,603 (19.7 <sup>b</sup> ) | 12,796 (11.4 <sup>b</sup> ) | 12,967 (11.2 <sup>b</sup> ) |
|                   | Total                   | 40,797 (39.3 <sup>b</sup> ) | 28,048 (24.3 <sup>b</sup> ) | 32,169 (28.6 <sup>b</sup> ) |

<sup>a</sup> Percentage of all tested genes.

<sup>b</sup> Percentage of all tested chromatin regions prior to merging adjacent genomic windows.
