# Supplementary material for: Integrative QTL analysis of gene expression and chromatin accessibility identifies multi-tissue patterns of genetic regulation
Source: PubMed Central journal article supplement (PMC7010298; doi:10.1371/journal.pgen.1008537), 2020-01-21
Supplement: pgen.1008537.s026.pdf [file pgen.1008537.s026.pdf]

Table S2: Number of genes with eQTL detected in liver, lung, and kidney tissues at  $FDR \leq 0.1$

| Procedure               | eQTL type                   | Tissue (%)                 |                            |                            |
|-------------------------|-----------------------------|----------------------------|----------------------------|----------------------------|
|                         |                             | Liver                      | Lung                       | Kidney                     |
| Analysis G              | All                         | 520 (6.2 <sup>a</sup> )    | 478 (4.2 <sup>a</sup> )    | 739 (7.3 <sup>a</sup> )    |
|                         | Local <sup>d</sup>          | 400 (76.9 <sup>b</sup> )   | 369 (77.2 <sup>b</sup> )   | 601 (81.3 <sup>b</sup> )   |
|                         | Distal <sup>e</sup>         | 132 (25.4 <sup>b</sup> )   | 112 (23.4 <sup>b</sup> )   | 148 (20.0 <sup>b</sup> )   |
| Analysis C              | All                         | 2,587 (30.8 <sup>a</sup> ) | 2,069 (18.2 <sup>a</sup> ) | 3,191 (31.6 <sup>a</sup> ) |
|                         | Local <sup>d</sup>          | 1,749 (67.6 <sup>c</sup> ) | 1,498 (72.4 <sup>c</sup> ) | 2,214 (69.4 <sup>c</sup> ) |
|                         | Distal <sup>e</sup>         | 838 (32.4 <sup>c</sup> )   | 571 (27.6 <sup>c</sup> )   | 977 (30.6 <sup>c</sup> )   |
| Analysis L <sup>f</sup> | Genome-wide FWER < 0.05     | 702 (8.4 <sup>a</sup> )    | 713 (6.3 <sup>a</sup> )    | 955 (9.5 <sup>a</sup> )    |
|                         | Chromosome-wide FWER < 0.05 | 1,661 (19.8 <sup>a</sup> ) | 1,880 (16.6 <sup>a</sup> ) | 2,102 (20.8 <sup>a</sup> ) |

<sup>a</sup> Percentage of all tested genes.

<sup>b</sup> Percentage of genes with eQTL from Analysis G.

<sup>c</sup> Percentage of genes with eQTL from Analysis C.

<sup>d</sup> Within 10Mb upstream or downstream of gene TSS.

<sup>e</sup> More than 10Mb upstream or downstream of gene TSS, or on another chromosome.

<sup>f</sup> Not FDR controlled.
