# Supplementary material for: Integrative QTL analysis of gene expression and chromatin accessibility identifies multi-tissue patterns of genetic regulation
Source: PubMed Central journal article supplement (PMC7010298; doi:10.1371/journal.pgen.1008537), 2020-01-21
Supplement: pgen.1008537.s027.pdf [file pgen.1008537.s027.pdf]

Table S3: Number of genes with eQTL detected in liver, lung, and kidney tissues at  $FDR \leq 0.2$

| Procedure  | eQTL type           | Tissue (%)                 |                            |                            |
|------------|---------------------|----------------------------|----------------------------|----------------------------|
|            |                     | Liver                      | Lung                       | Kidney                     |
| Analysis G | All                 | 881 (10.5 <sup>a</sup> )   | 811 (7.1 <sup>a</sup> )    | 1,189 (11.8 <sup>a</sup> ) |
|            | Local <sup>d</sup>  | 568 (64.5 <sup>b</sup> )   | 522 (64.4 <sup>b</sup> )   | 809 (68.0 <sup>b</sup> )   |
|            | Distal <sup>e</sup> | 339 (38.5 <sup>b</sup> )   | 301 (37.1 <sup>b</sup> )   | 411 (34.6 <sup>b</sup> )   |
| Analysis C | All                 | 4,699 (55.9 <sup>a</sup> ) | 3,675 (32.4 <sup>a</sup> ) | 5,469 (54.2 <sup>a</sup> ) |
|            | Local <sup>d</sup>  | 2,519 (53.6 <sup>c</sup> ) | 2,213 (60.2 <sup>c</sup> ) | 3,099 (56.7 <sup>c</sup> ) |
|            | Distal <sup>e</sup> | 2,180 (46.4 <sup>c</sup> ) | 1,462 (39.8 <sup>c</sup> ) | 2,370 (43.3 <sup>c</sup> ) |

<sup>a</sup> Percentage of all tested genes.

<sup>b</sup> Percentage of genes with eQTL from Analysis G.

<sup>c</sup> Percentage of genes with eQTL from Analysis C.

<sup>d</sup> Within 10Mb upstream or downstream of gene TSS.

<sup>e</sup> More than 10Mb upstream or downstream of gene TSS, or on another chromosome.
