# Supplementary material for: Integrative QTL analysis of gene expression and chromatin accessibility identifies multi-tissue patterns of genetic regulation
Source: PubMed Central journal article supplement (PMC7010298; doi:10.1371/journal.pgen.1008537), 2020-01-21
Supplement: pgen.1008537.s030.pdf [file pgen.1008537.s030.pdf]

Table S6: **Number of genes with chromatin mediation of local-eQTL in liver, lung, and kidney tissues**

| Procedure               | Significance    | Tissue (%)             |                         |                        |
|-------------------------|-----------------|------------------------|-------------------------|------------------------|
|                         |                 | Liver                  | Lung                    | Kidney                 |
| Analysis L <sup>b</sup> | genome-wide     | 13 (0.8 <sup>a</sup> ) | 42 (2.2 <sup>a</sup> )  | 21 (1.0 <sup>a</sup> ) |
|                         | chromosome-wide | 35 (2.1 <sup>a</sup> ) | 106 (5.6 <sup>a</sup> ) | 66 (3.1 <sup>a</sup> ) |

<sup>a</sup> Percentage of genes with a chromatin mediator that meet chromosome-wide significance for a local-eQTL through Analysis L.

<sup>b</sup> 10Mb upstream or downstream of the gene TSS with local-eQTL that meets chromosome-wide significance through Analysis L. Additionally, chromatin mediator must possess a local-cQTL that meets chromosome-wide significance through Analysis L.
